# Supplementary material for: Expert Involvement Predicts mHealth App Downloads: Multivariate Regression Analysis of Urology Apps
Source: PubMed Central journal article supplement (PMC4967182; doi:10.2196/mhealth.5738), 2016-07-15
Supplement: mhealth_v4i3e86_app2.pdf [file mhealth_v4i3e86_app2.pdf]

| <b>App name</b>                                                            | <b>Level of success</b> | <b>HCPp</b> |
|----------------------------------------------------------------------------|-------------------------|-------------|
| SMARTfiches Urologie Free                                                  | 10001-50000             | HCP_Urology |
| Urology - Medical Dictionary                                               | 10001-50000             | HCP_Urology |
| AUA Guidelines at a Glance                                                 | 5001-10000              | HCP_Urology |
| My Urologist - Мой уролог (ru)                                             | 5001-10000              | HCP_Urology |
| APps en Urologia                                                           | 1001-5000               | No HCPp     |
| AUA 2014 Annual Meeting                                                    | 1001-5000               | HCP_Urology |
| AUA Core Curriculum Mobile                                                 | 1001-5000               | HCP_Urology |
| AUAUniversity                                                              | 1001-5000               | HCP_Urology |
| Bladder Pal                                                                | 1001-5000               | HCP_Urology |
| DutasT                                                                     | 1001-5000               | Other HCPp  |
| EAU Stockholm 2014                                                         | 1001-5000               | HCP_Urology |
| EAU15                                                                      | 1001-5000               | HCP_Urology |
| IURO Pelvic Floor                                                          | 1001-5000               | HCP_Urology |
| PI-RADS Prostate MRI                                                       | 1001-5000               | Other HCPp  |
| Prostate Aerobics                                                          | 1001-5000               | No HCPp     |
| Prostate Cancer Calculator                                                 | 1001-5000               | No HCPp     |
| Prostate Pal 2                                                             | 1001-5000               | HCP_Urology |
| Renal & Urology News                                                       | 1001-5000               | Other HCPp  |
| Uro+                                                                       | 1001-5000               | HCP_Urology |
| Urology Board Review Manual                                                | 1001-5000               | HCP_Urology |
| Urology Guidelines PrimaryCare                                             | 1001-5000               | HCP_Urology |
| UrologyMatch                                                               | 1001-5000               | HCP_Urology |
| 101st of Annual Meeting (Japan Convention Services, Inc 第101回日本泌尿器科学会総会)   | 501-1000                | HCP_Urology |
| Mobile Planner (Chinese)                                                   |                         |             |
| AUA Medical Student Curriculum                                             | 501-1000                | HCP_Urology |
| AUA Men's Health Checklist                                                 | 501-1000                | HCP_Urology |
| IURO Andrology                                                             | 501-1000                | HCP_Urology |
| IURO Oncology                                                              | 501-1000                | HCP_Urology |
| Kidney Cancer                                                              | 501-1000                | No HCPp     |
| Mictionary                                                                 | 501-1000                | Other HCPp  |
| PI-RADS IRM Prostate fr                                                    | 501-1000                | Other HCPp  |
| Renal Mass - Bosniak                                                       | 501-1000                | Other HCPp  |
| USICON 2014                                                                | 501-1000                | HCP_Urology |
| 102nd Japanese UA (Japan Convention Services, Inc 第102回日本泌尿器科学会総会)         | 101-500                 | HCP_Urology |
| Mobile Planner (Chinese)                                                   |                         |             |
| 64th Conference of the Urological Association - 제64차 대한비뇨기과학회 학술대회(Korean) | 101-500                 | HCP_Urology |
| ATlas Quirurgico de Urologia Pratica                                       | 101-500                 | HCP_Urology |
| AUA Member Search                                                          | 101-500                 | HCP_Urology |
| Bedwetting solutions                                                       | 101-500                 | No HCPp     |
| Besins UroMedica                                                           | 101-500                 | Other HCPp  |
| Braz J Urol                                                                | 101-500                 | HCP_Urology |
| Briganti Nomogram                                                          | 101-500                 | No HCPp     |
| CBU 2013                                                                   | 101-500                 | HCP_Urology |
| CFU 2014                                                                   | 101-500                 | HCP_Urology |
| DGU 2012                                                                   | 101-500                 | HCP_Urology |

| <b>App name</b>                                         | <b>Level of success</b> | <b>HCPp</b> |
|---------------------------------------------------------|-------------------------|-------------|
| DGU 2013                                                | 101-500                 | HCP_Urology |
| DGU 2014 - Kongress App                                 | 101-500                 | HCP_Urology |
| EAU Pocket Guidelines                                   | 101-500                 | HCP_Urology |
| European urology                                        | 101-500                 | HCP_Urology |
| Int'l Urogynecology Journal                             | 101-500                 | HCP_Urology |
| JUA2012                                                 | 101-500                 | HCP_Urology |
| Masaüstü Başvuru Kitabı                                 | 101-500                 | HCP_Urology |
| Neurology advisor                                       | 101-500                 | HCP_Urology |
| Practical Urology                                       | 101-500                 | HCP_Urology |
| Prostate Cancer - البروستات سرطان (Arabic)              | 101-500                 | Other HCPp  |
| Prostate In Focus                                       | 101-500                 | Other HCPp  |
| PROSTATE INTERNATIONAL                                  | 101-500                 | HCP_Urology |
| ROU – POY (ru)                                          | 101-500                 | HCP_Urology |
| SIU                                                     | 101-500                 | HCP_Urology |
| SIU 2013                                                | 101-500                 | HCP_Urology |
| SMU 2014                                                | 101-500                 | HCP_Urology |
| ÜCD Kongre 2012                                         | 101-500                 | HCP_Urology |
| UroAssist                                               | 101-500                 | No HCPp     |
| URoCongress 2012                                        | 101-500                 | HCP_Urology |
| Urolithiasis Assist                                     | 101-500                 | No HCPp     |
| Urología Práctica                                       | 101-500                 | HCP_Urology |
| Urological Ultrasound                                   | 101-500                 | Other HCPp  |
| BMC Urology                                             | 51-100                  | HCP_Urology |
| EAUN Stockholm 2014                                     | 51-100                  | HCP_Urology |
| EAUN15                                                  | 51-100                  | HCP_Urology |
| ESPU 2012                                               | 51-100                  | HCP_Urology |
| ESPU 2013                                               | 51-100                  | HCP_Urology |
| Fertilidad del varon                                    | 51-100                  | HCP_Urology |
| IURO Kidney                                             | 51-100                  | HCP_Urology |
| IURO Prostate Pro                                       | 51-100                  | HCP_Urology |
| Men's Guide To Prostate Health                          | 51-100                  | No HCPp     |
| NMIBC Toolbox                                           | 51-100                  | No HCPp     |
| Tiempo de doblaje de PSA                                | 51-100                  | No HCPp     |
| Urología Para Ginecólogos                               | 51-100                  | HCP_Urology |
| Urología Práctica para Médicos de Familia y Internistas | 51-100                  | HCP_Urology |
| URologidagarna2012                                      | 51-100                  | HCP_Urology |
| Urology Nation                                          | 51-100                  | HCP_Urology |
| USICON 2013                                             | 51-100                  | HCP_Urology |
| 28 Congreso de urologia 2014                            | 11-50                   | HCP_Urology |
| AUA Journals                                            | 11-50                   | HCP_Urology |
| BAUS 2015                                               | 11-50                   | HCP_Urology |
| Bedwetting Diary                                        | 11-50                   | No HCPp     |
| CAU2014                                                 | 11-50                   | HCP_Urology |
| CMU 2015                                                | 11-50                   | HCP_Urology |
| CURE-UAB 2014                                           | 11-50                   | HCP_Urology |
| Daily-P                                                 | 11-50                   | HCP_Urology |
| Foundation Urology                                      | 11-50                   | Other HCPp  |

| <b>App name</b>                     | <b>Level of success</b> | <b>HCPp</b> |
|-------------------------------------|-------------------------|-------------|
| HapPee Time                         | 11-50                   | No HCPp     |
| IReflux Risk Calculator             | 11-50                   | No HCPp     |
| Itsamanthing - Prostate Cancer      | 11-50                   | No HCPp     |
| IURO Andrology PRO                  | 11-50                   | HCP_Urology |
| IURO Oncology Pro                   | 11-50                   | HCP_Urology |
| IURO Pelvic Floor Pro               | 11-50                   | HCP_Urology |
| JUS - Journal of Urological Surgery | 11-50                   | HCP_Urology |
| Kidney And Bladder Problems         | 11-50                   | No HCPp     |
| Learning Urology Quiz               | 11-50                   | Other HCPp  |
| Mi prostata                         | 11-50                   | HCP_Urology |
| Oxford Handbook Urology 2nd Ed      | 11-50                   | HCP_Urology |
| PipiTrainer Lite                    | 11-50                   | Other HCPp  |
| Prac. Urology for Primary Care      | 11-50                   | HCP_Urology |
| Prostate Cancer                     | 11-50                   | Other HCPp  |
| Prostate Health                     | 11-50                   | HCP_Urology |
| Rotterdam Prostate Cancer Risk      | 11-50                   | HCP_Urology |
| SMARTfiches Urologie                | 11-50                   | HCP_Urology |
| Stop Your Child's Bedwetting        | 11-50                   | No HCPp     |
| SuperFoods For Prostate Health      | 11-50                   | No HCPp     |
| Uro Challenge                       | 11-50                   | HCP_Urology |
| URologidagarna 2013                 | 11-50                   | HCP_Urology |
| Urology For Gynecologists           | 11-50                   | HCP_Urology |
| Urology Glossary                    | 11-50                   | No HCPp     |
| Urology times                       | 11-50                   | HCP_Urology |
| Urology, 1000 MCQs                  | 11-50                   | Other HCPp  |
| UroVote                             | 11-50                   | No HCPp     |
| Male impotence risk evaluation      | 6-10                    | No HCPp     |
| Urology - Pediatric, 1000 MCQs      | 6-10                    | Other HCPp  |
| Vasectomy Reversal                  | 6-10                    | Other HCPp  |
| 100% Urologie                       | 1-5                     | HCP_Urology |
| Dealing with Prostate Cancer        | 1-5                     | No HCPp     |
| ProstateMD                          | 1-5                     | HCP_Urology |
| The 5 Minute Urology Consult 3      | 1-5                     | HCP_Urology |
| Urological Surgery                  | 1-5                     | HCP_Urology |
| Urology News                        | 1-5                     | No HCPp     |
| 101 Tips Stop Child Bedwetting      | no installs             | No HCPp     |
| Prostate Cancer v2                  | no installs             | HCP_Urology |
| Testicle pain, testicle tumors      | no installs             | No HCPp     |
| Urologic Nurse CURN, 800 MCQs       | no installs             | Other HCPp  |
